# Supplementary material
Source: publisher site journal article supplement (https://www.dovepress.com/article/400557)
Supplement: Supplementary file 1 [file get_supplementary_file.php]

**Table S1 Functional enrichment analyses of the overlapping DEGs among the three comparison groups.**

| Category | Term | Count | PValue | FDR | Genes |
| --- | --- | --- | --- | --- | --- |
| GOTERM_BP_DIRECT | GO:0006954~inflammatory response | 35 | 5.01E-16 | 1.28E-12 | *Ptgfr, Cxcl6, Ccl12, Cxcl9, Lxn, Cxcl1, Thbs1, Aif1, Cxcl2, C3, Cyp26b1, Ccl7, Nfkbiz, Ccl3, Olr1, S1pr3, Map2k3, Il4r, Ccl21, Il15, Ccl20, Igfbp4, Slc11a1, Rarres2, Pla2g2a, Tnfrsf1a, Selp, Cxcl10, Il6, Cd8a, Sdc1, Chi3l1, Ms4a2, Hamp, Lat* |
| GOTERM_BP_DIRECT | GO:0071347~cellular response to interleukin-1 | 18 | 3.84E-11 | 4.90E-08 | *Ccl12, Cebpb, Ccl21, Ccl20, Mmp3, Serpine1, Inhbb, Aqp4, Cxcl2, Smpd3, Il6, Sfrp1, Ccl7, Cfl1, Lcn2, Ccl3, Ankrd1, Chi3l1* |
| GOTERM_BP_DIRECT | GO:0030198~extracellular matrix organization | 21 | 9.21E-11 | 7.83E-08 | *Vit, Col18a1, Mmp3, Mmp10, Agt, Adamts16, Adamts4, Mmp11, Smoc2, Adamtsl5, Adamtsl4, Adamts19, Adamts1, Crispld2, Bcl3, Col8a2, Col8a1, Vwa1, Ptx3, Col6a6, Reck* |
| GOTERM_BP_DIRECT | GO:0032496~response to lipopolysaccharide | 25 | 4.02E-10 | 2.56E-07 | *Ptgfr, Cxcl6, Cebpb, Serpine1, Mgst2, Csf2rb, Cxcl1, Ltc4s, Litaf, Loxl1, Socs3, Gja1, Ednrb, Lbp, Entpd1, Slc11a1, Mmp3, Dio2, Tnfrsf1a, Selp, Cxcl10, Il6, Slpi, Scgb1a1, Trib1* |
| GOTERM_BP_DIRECT | GO:0030593~neutrophil chemotaxis | 14 | 9.35E-10 | 4.77E-07 | *Cxcl6, Cxcl9, Ccl12, Ccl21, Ccl20, Cxcl1, Cxcl2, Cxcl10, Ccl7, Ccl3, Pde4b, Lbp, Ppib, Ppia* |
| GOTERM_BP_DIRECT | GO:0071222~cellular response to lipopolysaccharide | 22 | 1.09E-07 | 4.65E-05 | *Map2k3, Cxcl6, Cxcl9, Entpd1, Cebpb, Ccl20, Serpine1, Cxcl1, Ltc4s, Litaf, Cxcl2, Cxcl10, Slc7a5, Il6, Ednrb, Lcn2, Pde4b, Ankrd1, Irf8, Hmgcs2, Lbp, Hamp* |
| GOTERM_BP_DIRECT | GO:0071356~cellular response to tumor necrosis factor | 17 | 4.49E-07 | 1.64E-04 | *Entpd1, Ccl12, Ccl21, Ccl20, Cib1, Thbs1, Smpd3, Il6, Sfrp1, Fabp4, Ccl7, Cfl1, Lcn2, Ccl3, Ankrd1, Chi3l1, Hamp* |
| GOTERM_BP_DIRECT | GO:0042060~wound healing | 15 | 7.45E-07 | 2.37E-04 | *Gsn, Sdc4, Dst, Ccl20, Slc11a1, Mmp3, F13a1, Ppl, Cxcl2, Vegfa, Il6, Sdc1, Timp1, Plpp3, Eng* |
| GOTERM_BP_DIRECT | GO:0030335~positive regulation of cell migration | 20 | 1.01E-06 | 2.58E-04 | *Col18a1, Lrrc15, Grn, Cemip, Atp8a1, Myoc, Sema3c, Sema3d, Mmp3, Cxcr4, Cib1, Thbs1, Aif1, Syne2, Vegfa, Cxcl10, Ccl7, Mdk, Ccl3, Snai1* |
| GOTERM_BP_DIRECT | GO:0070098~chemokine-mediated signaling pathway | 10 | 1.00E-06 | 2.58E-04 | *Cxcl10, Cxcl6, Cxcl9, Ccl12, Ccl21, Ccl7, Ccl20, Ccl3, Cxcl1, Cxcl2* |
| GOTERM_BP_DIRECT | GO:0042493~response to drug | 28 | 1.12E-06 | 2.60E-04 | *Col18a1, Ptn, Add3, Ltc4s, Thbs1, Socs3, Mdk, Ccl3, Hmox1, Hmgcs2, Bak1, Junb, Fzd1, Cbx7, Uts2r, Npff, Aldh1a3, Il6, Sfrp1, Fabp4, Actc1, Ddit3, Scgb1a1, Lcn2, Fosb, Calr, Ada, Eng* |
| GOTERM_BP_DIRECT | GO:0009410~response to xenobiotic stimulus | 28 | 1.85E-06 | 3.94E-04 | *Col18a1, Ptn, Add3, Ltc4s, Thbs1, Socs3, Mdk, Ccl3, Hmox1, Hmgcs2, Bak1, Junb, Fzd1, Cbx7, Uts2r, Npff, Aldh1a3, Il6, Sfrp1, Fabp4, Actc1, Ddit3, Scgb1a1, Lcn2, Fosb, Calr, Ada, Eng* |
| GOTERM_BP_DIRECT | GO:0008284~positive regulation of cell proliferation | 30 | 2.10E-06 | 4.12E-04 | *Col18a1, Cntfr, Ptgfr, Grn, Thrb, Cib1, Ptn, Thbs1, Aif1, Dpp4, Ccnd3, Efemp1, Ednrb, Enpp2, Timp1, Marcksl1, Il15, Clec11a, Lifr, Agt, Vegfa, Apln, Mlxipl, Cxcl10, Il6, Sfrp1, Fabp4, Mdm4, Calr, Crlf1* |
| GOTERM_BP_DIRECT | GO:0009617~response to bacterium | 17 | 3.96E-06 | 7.21E-04 | *Cxcl9, Slc11a1, Usp18, C3, Cd79b, Cxcl10, Socs3, Mt2a, Il6, Fabp4, Rgs1, Tnnt2, Lcn2, Irf8, Scn7a, Hmgcs2, Ms4a1* |
| GOTERM_BP_DIRECT | GO:0034097~response to cytokine | 11 | 1.48E-05 | 0.002101 | *Selp, Socs3, Il6, Mmp3, Scgb1a1, Serpine1, Lifr, Timp1, Aif1, Junb, Fosl2* |
| GOTERM_BP_DIRECT | GO:0051384~response to glucocorticoid | 12 | 2.74E-05 | 0.003674 | *C3, Socs3, Il6, Fabp4, Mdk, Scgb1a1, Sdc1, Aqp4, Cxcl1, Hmgcs2, Aif1, Cxcl2* |
| GOTERM_BP_DIRECT | GO:0019221~cytokine-mediated signaling pathway | 12 | 4.45E-05 | 0.005405 | *Fkbp1a, Cntfr, Il6, Il4r, Cish, Ptprn, Ebi3, Lifr, Csf2rb, Il2rg, Crlf1, Tnfrsf1a* |
| GOTERM_BP_DIRECT | GO:0032355~response to estradiol | 15 | 4.90E-05 | 0.005681 | *Ptgfr, Grn, Arpc1b, Mmp3, Cxcl1, Ptn, Cxcl2, Agt, Fosl2, Vegfa, C3, Socs3, Gja1, Calr, Ldlr* |
| GOTERM_BP_DIRECT | GO:0007568~aging | 19 | 7.45E-05 | 0.007919 | *Gsn, Il15, Pax5, Litaf, Agt, Fosl2, Vegfa, Smpd3, Socs3, Il6, Ednrb, Adrb3, Ddit3, Nox4, Bak1, Timp1, Ldlr, Hamp, Ada* |
| GOTERM_BP_DIRECT | GO:0045766~positive regulation of angiogenesis | 13 | 1.05E-04 | 0.010344 | *Uts2r, Grn, Serpine1, Thbs1, Runx1, Vegfa, Tnfrsf1a, C3, Smoc2, Aplnr, Chi3l1, Hmox1, Eng* |
| GOTERM_BP_DIRECT | GO:0006955~immune response | 16 | 2.22E-04 | 0.018911 | *Sectm1b, Clec4a1, Sectm1a, Clec4a2, Il4r, Il15, Lst1, Cxcr4, Cxcl1, Thbs1, Cxcl10, Slpi, Enpp2, Irf8, Ms4a2, Lat* |
| GOTERM_BP_DIRECT | GO:0071346~cellular response to interferon-gamma | 10 | 2.83E-04 | 0.022549 | *Socs3, Ccl12, Gsn, Ccl21, Ccl7, Ccl20, Ccl3, Irf8, Aqp4, Aif1* |
| GOTERM_BP_DIRECT | GO:0007204~positive regulation of cytosolic calcium ion concentration | 12 | 5.19E-04 | 0.038948 | *Ptgfr, Uts2r, Gja1, Fzd2, Ednrb, Npff, Ccl3, Cxcr4, Cxcl1, Cxcl2, Agt, Cd55* |
| KEGG_PATHWAY | rno04061:Viral protein interaction with cytokine and cytokine receptor | 15 | 3.35E-11 | 2.71E-09 | *Cxcl6, Cxcl9, Ccl12, Ccl21, Ccl20, Cxcr4, Cxcl1, Il2rg, Cxcl14, Cxcl2, Tnfrsf1a, Cxcl10, Il6, Ccl7, Ccl3* |
| KEGG_PATHWAY | rno04060:Cytokine-cytokine receptor interaction | 24 | 1.61E-10 | 1.31E-08 | *Gdf10, Cntfr, Cxcl6, Cxcl9, Ccl12, Il4r, Tnfrsf12a, Ccl21, Ccl20, Il15, Ebi3, Cxcr4, Csf2rb, Inhbb, Lifr, Cxcl1, Il2rg, Cxcl14, Cxcl2, Tnfrsf1a, Cxcl10, Il6, Ccl7, Ccl3* |
| KEGG_PATHWAY | rno04668:TNF signaling pathway | 15 | 1.14E-09 | 9.21E-08 | *Map2k3, Cxcl6, Ccl12, Cebpb, Ccl20, Il15, Mmp3, Cxcl1, Cxcl2, Tnfrsf1a, Cxcl10, Socs3, Il6, Bcl3, Junb* |
| KEGG_PATHWAY | rno04657:IL-17 signaling pathway | 12 | 4.84E-08 | 3.92E-06 | *Cxcl10, Cxcl6, Il6, Cebpb, Ccl12, Ccl7, Ccl20, Mmp3, Lcn2, Fosb, Cxcl1, Cxcl2* |
| KEGG_PATHWAY | rno05323:Rheumatoid arthritis | 10 | 1.09E-06 | 8.80E-05 | *Cxcl6, Il6, Ccl12, Ccl20, Il15, Mmp3, Ccl3, Cxcl1, Cxcl2, Vegfa* |
| KEGG_PATHWAY | rno04062:Chemokine signaling pathway | 13 | 6.55E-06 | 5.31E-04 | *Cxcl6, Cxcl9, Ccl12, Ccl21, Ccl20, Cxcr4, Cxcl1, Cxcl14, Cxcl2, Cxcl10, Gngt2, Ccl7, Ccl3* |
| KEGG_PATHWAY | rno05200:Pathways in cancer | 24 | 1.43E-05 | 0.001157 | *Fzd1, Fzd2, Ralb, Il4r, Gadd45b, Il15, Gadd45a, Hhip, Zbtb16, Cxcr4, Mgst2, Csf2rb, Il2rg, Agt, Runx1, Vegfa, Ccnd3, Il6, Gngt2, Ednrb, Gsta4, Pim1, Hmox1, Bak1* |
| KEGG_PATHWAY | rno05417:Lipid and atherosclerosis | 13 | 2.19E-05 | 0.001777 | *Map2k3, Ccl12, Mmp3, Cxcl1, Cxcl2, Tnfrsf1a, Selp, Il6, Ddit3, Ccl3, Olr1, Lbp, Ldlr* |
| KEGG_PATHWAY | rno04630:JAK-STAT signaling pathway | 11 | 2.58E-05 | 0.002087 | *Cntfr, Socs3, Il6, Ccnd3, Il4r, Cish, Il15, Pim1, Lifr, Csf2rb, Il2rg* |
| KEGG_PATHWAY | rno05202:Transcriptional misregulation in cancer | 12 | 3.72E-05 | 0.003012 | *Il6, Cebpb, Nr4a3, Gadd45b, Gadd45a, Ddit3, Zbtb16, Nfkbiz, Mmp3, Pax5, Bak1, Runx1* |
| KEGG_PATHWAY | rno04666:Fc gamma R-mediated phagocytosis | 8 | 5.20E-05 | 0.004214 | *Marcksl1, Gsn, Arpc3, Arpc1b, Cfl1, Plpp3, Plpp1, Lat* |
| KEGG_PATHWAY | rno04064:NF-kappa B signaling pathway | 8 | 6.17E-05 | 0.005001 | *Ccl21, Gadd45b, Gadd45a, Cxcl1, Lbp, Cxcl2, Lat, Tnfrsf1a* |
| KEGG_PATHWAY | rno04115:p53 signaling pathway | 6 | 2.46E-04 | 0.019962 | *Ccnd3, Gadd45b, Gadd45a, Serpine1, Mdm4, Thbs1* |
| KEGG_PATHWAY | rno04620:Toll-like receptor signaling pathway | 6 | 6.08E-04 | 0.049273 | *Map2k3, Cxcl10, Il6, Cxcl9, Ccl3, Lbp* |
